# Supplementary material
Source: Springer Nature journal article supplement (https://www.springermedizin.de/resource/supplementary/12882_2013_816_MOESM1_ESM.pdf/9454370)
Supplement: MOESM1 [file 9454370]

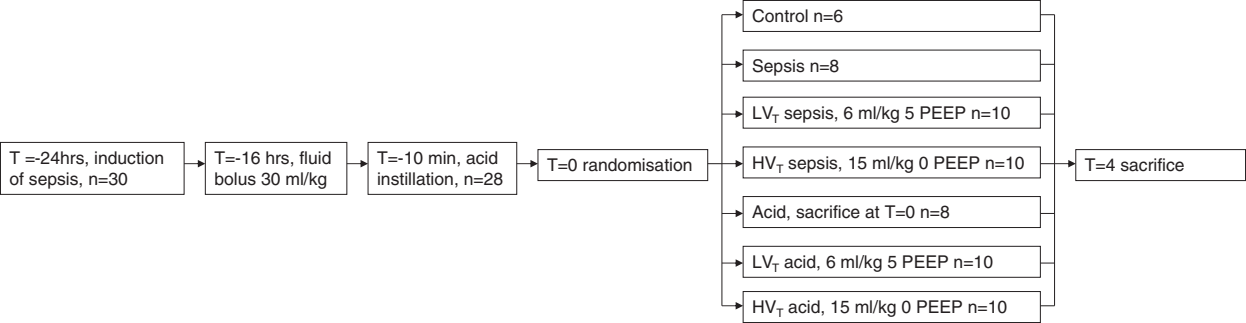

T = -24hrs, induction of sepsis, n=30

T = -16 hrs, fluid bolus 30 ml/kg

T = -10 min, acid instillation, n=28

T=0 randomisation

Control n=6

Sepsis n=8

LV<sub>T</sub> sepsis, 6 ml/kg 5 PEEP n=10

HV<sub>T</sub> sepsis, 15 ml/kg 0 PEEP n=10

Acid, sacrifice at T=0 n=8

LV<sub>T</sub> acid, 6 ml/kg 5 PEEP n=10

HV<sub>T</sub> acid, 15 ml/kg 0 PEEP n=10

T=4 sacrifice
